# Supplementary material for: Guiding Students to Develop an Understanding of Scientific Inquiry: A Science Skills Approach to Instruction and Assessment
Source: Atypon-hosted journal article supplement (doi:10.1187/cbe-12-11-0198), 2014-03-01
Supplement: combinedsupmats1.pdf [file combinedsupmats1.pdf]

# Supplemental Material

*CBE—Life Sciences Education*

*Stone et al.*

## Supplemental Material

1. Do you consider yourself a good at science?  
(Circle your rating of yourself, 1= excellent, 3= medium, 5= struggling)

1      2      3      4      5

Why?

2. Name three skills that you think are important for doing science well, and explain why you picked them.

3. Do you like to do projects in a group or with a partner?  
(Circle your rating, 1= strong yes, 3= neutral, 5= strong no)

1      2      3      4      5

Why?

4. Why do you think that some groups are more successful at working together than others?

5. What are your strengths in doing science?

| <b>Category</b>                              | <b>Exemplary</b>                                                                                                                                                             | <b>Developing</b>                                                                                                                                                   | <b>Beginner</b>                                                                                                                                |
|----------------------------------------------|------------------------------------------------------------------------------------------------------------------------------------------------------------------------------|---------------------------------------------------------------------------------------------------------------------------------------------------------------------|------------------------------------------------------------------------------------------------------------------------------------------------|
| <b>Contributing &amp; Listening to Ideas</b> | <p>All members of our team contributed ideas about the project with each other.</p> <p>All members of our team listened well when someone else was contributing an idea.</p> | <p>Some members of our team contributed more ideas than others.</p> <p>Some members of our team did not listen to others.</p>                                       | <p>On our team, we did not discuss many ideas about the project with each other.</p> <p>On our team, we did not listen well to each other.</p> |
| <b>Sharing in Work Equally</b>               | All members of our team did an equal share of work to get the final product finished.                                                                                        | Some members of our team did more work than others.                                                                                                                 | Some people on our team did all the work, and other people on our team did almost nothing.                                                     |
| <b>Using Time Efficiently</b>                | We worked at a good pace so that we easily finished our project to meet the deadline.                                                                                        | We were not efficient with our time, so that we were rushed to meet the deadline.                                                                                   | We worked so inefficiently that we did not finish on time.                                                                                     |
| <b>Making Decisions</b>                      | Our team made decisions about our different ideas together. Everyone was open to considering alternatives.                                                                   | Some members were not open to changing their mind, and decisions were difficult. Or, some members didn't say what they were really thinking just to avoid conflict. | It was almost impossible to make decisions together as a group, so one person just ended up making the decisions that needed to be made.       |
| <b>Discussing Science</b>                    | Our team had a lot of productive discussions about science that helped make our work the best quality possible.                                                              | Our team had some discussions about science, but we were off task more than we should have been.                                                                    | Our team talked mostly about things that were not science.                                                                                     |
